# Supplementary material
Source: HighWire-hosted journal article supplement (https://bmjopen.bmj.com/content/12/3/e049646)
Supplement: inline-supplementary-material-1 [file inline-supplementary-material-1.pdf]

UIN: 

**Effect of smoking on ovarian reserve parameters, sperm parameters and embryo quality in sub-fertile couples.**

*We would be grateful if you could complete this short questionnaire.  
This information will be confidential and accessed only by the research team.*

- 1) Are you
  - Male
  - Female
- 2) As regards cigarette smoking, do you consider yourself a
  - Current smoker
  - Ex-smoker
  - Never smoker
- 3) If you are a current smoker
  - How often do you smoke?
    - Daily
    - 3-6 days in a week
    - 1-2 days a week
    - less than once a week
  - How many cigarettes do you smoke per day?
  - How long have you been smoking?
- 4) If you are an ex-smoker,
  - When did you stop smoking? (mm/yyyy)
  - How often did you smoke?
    - Daily
    - 3-6 days in a week
    - 1-2 days a week
    - Less than once a week
  - How many cigarettes did you smoke per day?
  - How long had you been smoking before you stopped?
- 5) Does anyone living/working closely with you smoke in your presence (are you a passive smoker)?
  - Yes
  - No
- 6) Do you use electronic cigarettes/vaping?
  - Yes
  - No

*Thank you for taking part in the study and taking time to complete this questionnaire.*

Dr Priya Bhide  
Principal investigator
